# Supplementary material for: Serological Positivity against Selected Flaviviruses and Alphaviruses in Free-Ranging Bats and Birds from Costa Rica Evidence Exposure to Arboviruses Seldom Reported Locally in Humans
Source: MDPI journal article supplement (doi:10.3390/v14010093), 2022-01-06
Supplement: s1 [file s1]

Supplementary Table S2. List of bats collected in Talamanca.

| <b>Identification</b> | <b>Species</b>                | <b>Sex</b> | <b>Age</b> | <b>Reproductive status</b> | <b>Weight (g)</b> | <b>Collection site Identification</b> | <b>Mist Net Location</b> |
|-----------------------|-------------------------------|------------|------------|----------------------------|-------------------|---------------------------------------|--------------------------|
| MTAA1                 | <i>Uroderma convexum</i>      | Male       | Adult      | Inactive                   | 15                | CTAA                                  | Peridomiciliary          |
| MTAB1                 | <i>Noctilio leporinus</i>     | Male       | Adult      | Inactive                   | 66                | CTAB                                  | Forest                   |
| MTAB2                 | <i>Artibeus watsoni</i>       | Male       | Adult      | Inactive                   | 10.5              | CTAB                                  | Peridomiciliary          |
| MTAB4                 | <i>Artibeus watsoni</i>       | Male       | Adult      | Inactive                   | 10.5              | CTAB                                  | Forest                   |
| MTAB5                 | <i>Carollia perspicillata</i> | Male       | Adult      | Inactive                   | 18.5              | CTAB                                  | Forest                   |
| MTAB7                 | <i>Artibeus jamaicensis</i>   | Female     | Adult      | Pregnant                   | 57                | CTAB                                  | Forest                   |
| MTAB8                 | <i>Carollia perspicillata</i> | Male       | Adult      | Inactive                   | 18                | CTAB                                  | Forest                   |
| MTAB10                | <i>Artibeus jamaicensis</i>   | Male       | Adult      | Inactive                   | 46                | CTAB                                  | Forest                   |
| MTAB11                | <i>Uroderma convexum</i>      | Male       | Adult      | Inactive                   | 14                | CTAB                                  | Forest                   |
| MTAB13                | <i>Carollia perspicillata</i> | Female     | Adult      | Pregnant                   | 23                | CTAB                                  | Forest                   |
| MTAC1                 | <i>Uroderma convexum</i>      | Female     | Adult      | Inactive                   | 15                | CTAC                                  | Forest                   |
| MTAC2                 | <i>Glossophaga soricina</i>   | Male       | Adult      | Inactive                   | 9.5               | CTAC                                  | Peridomiciliary          |
| MTAC3                 | <i>Glossophaga soricina</i>   | Male       | Adult      | Inactive                   | 9                 | CTAC                                  | Forest                   |
| MTAC4                 | <i>Glossophaga soricina</i>   | Female     | Adult      | Pregnant                   | 12                | CTAC                                  | Forest                   |
| MTAD1                 | <i>Carollia perspicillata</i> | Male       | Adult      | Inactive                   | 22                | CTAD                                  | Forest                   |
| MTAD2                 | <i>Carollia perspicillata</i> | Male       | Adult      | Inactive                   | 24                | CTAD                                  | Forest                   |
| MTAD3                 | <i>Lonchophylla robusta</i>   | Female     | Adult      | Inactive                   | 14                | CTAD                                  | Forest                   |
| MTAE1                 | <i>Carollia perspicillata</i> | Female     | Adult      | Inactive                   | 16                | CTAE                                  | Forest                   |
| MTAE3                 | <i>Carollia castanea</i>      | Male       | Adult      | Inactive                   | 10.5              | CTAE                                  | Forest                   |
| MTAE5                 | <i>Glossophaga soricina</i>   | Male       | Adult      | Inactive                   | 8.5               | CTAE                                  | Forest                   |
| MTAE7                 | <i>Platyrrhinus helleri</i>   | Male       | Adult      | Inactive                   | 15                | CTAE                                  | Forest                   |

| Identification | Species                       | Sex    | Age   | Reproductive status | Weight (g) | Collection site Identification | Mist Net Location |
|----------------|-------------------------------|--------|-------|---------------------|------------|--------------------------------|-------------------|
| MTAE9          | <i>Glossophaga soricina</i>   | Male   | Adult | Inactive            | 9.5        | CTAE                           | Forest            |
| MTAE11         | <i>Uroderma convexum</i>      | Male   | Adult | Inactive            | 17         | CTAE                           | Forest            |
| MTAE13         | <i>Glossophaga soricina</i>   | Female | Adult | Inactive            | 10         | CTAE                           | Forest            |
| MTAE15         | <i>Glossophaga soricina</i>   | Male   | Adult | Inactive            | 9          | CTAE                           | Forest            |
| MTAF1          | <i>Carollia perspicillata</i> | Male   | Adult | Inactive            | 16         | CTAF                           | Peridomiciliary   |
| MTAF3          | <i>Uroderma convexum</i>      | Male   | Adult | Inactive            | 16         | CTAF                           | Peridomiciliary   |
| MTAF5          | <i>Artibeus lituratus</i>     | Male   | Adult | Inactive            | 58         | CTAF                           | Peridomiciliary   |
| MTAF7          | <i>Uroderma convexum</i>      | Male   | Adult | Inactive            | 17         | CTAF                           | Peridomiciliary   |
| MTAF9          | <i>Carollia perspicillata</i> | Female | Adult | Pregnant            | 22.5       | CTAF                           | Peridomiciliary   |
| MTAG1          | <i>Rogheessa io</i>           | Male   | Adult | Inactive            | 4          | CTAG                           | Forest            |
| MTAG3          | <i>Saccopteryx bilineata</i>  | Male   | Adult | Inactive            | 4          | CTAG                           | Forest            |
| MTAG5          | <i>Artibeus jamaicensis</i>   | Female | Adult | Inactive            | 42         | CTAG                           | Peridomiciliary   |
| MTAG7          | <i>Artibeus jamaicensis</i>   | Female | Adult | Inactive            | 45         | CTAG                           | Forest            |
| MTAG9          | <i>Artibeus jamaicensis</i>   | Female | Adult | Inactive            | 53         | CTAG                           | Forest            |
| MTAH1          | <i>Uroderma convexum</i>      | Female | Adult | Pregnant            | 27         | CTAH                           | Peridomiciliary   |
| MTAH2          | <i>Uroderma convexum</i>      | Female | Adult | Inactive            | 16         | CTAH                           | Peridomiciliary   |
| MTAH3          | <i>Uroderma convexum</i>      | Male   | Adult | Inactive            | 16         | CTAH                           | Peridomiciliary   |
| MTAH4          | <i>Uroderma convexum</i>      | Female | Adult | Pregnant            | 22         | CTAH                           | Peridomiciliary   |
| MTAH5          | <i>Uroderma convexum</i>      | Male   | Adult | Inactive            | 16         | CTAH                           | Peridomiciliary   |
| MTAJ1          | <i>Carollia castanea</i>      | Male   | Adult | Inactive            | 13         | CTAB                           | Forest            |
| MTAJ2          | <i>Carollia castanea</i>      | Female | Adult | Pregnant            | 15         | CTAB                           | River             |
| MTAJ3          | <i>Myotis nigricans</i>       | Female | Adult | Pregnant            | 5.5        | CTAB                           | River             |
| MTAJ5          | <i>Carollia perspicillata</i> | Female | Adult | Inactive            | 20         | CTAB                           | Forest            |
| MTAJ6          | <i>Artibeus jamaicensis</i>   | Male   | Adult | Inactive            | 52         | CTAB                           | Forest            |

| Identification | Species                       | Sex    | Age   | Reproductive status | Weight (g) | Collection site Identification | Mist Net Location |
|----------------|-------------------------------|--------|-------|---------------------|------------|--------------------------------|-------------------|
| MTAJ7          | <i>Artibeus jamaicensis</i>   | Male   | Adult | Inactive            | 46         | CTAB                           | Forest            |
| MTAJ8          | <i>Carollia castanea</i>      | Male   | Adult | Inactive            | 12         | CTAB                           | Peridomiciliary   |
| MTAJ9          | <i>Carollia castanea</i>      | Female | Adult | Inactive            | 11         | CTAB                           | Peridomiciliary   |
| MTAJ10         | <i>Phyllostomus discolor</i>  | Male   | Adult | Inactive            | 44         | CTAB                           | River             |
| MTAK1          | <i>Artibeus jamaicensis</i>   | Female | Adult | Inactive            | 54         | CTAD                           | Forest            |
| MTAK3          | <i>Artibeus jamaicensis</i>   | Male   | Adult | Inactive            | 50         | CTAD                           | Forest            |
| MTAK5          | <i>Artibeus jamaicensis</i>   | Male   | Adult | Inactive            | 52         | CTAD                           | Forest            |
| MTAK9          | <i>Artibeus jamaicensis</i>   | Male   | Adult | Inactive            | 45         | CTAD                           | Peridomiciliary   |
| MTAK10         | <i>Rhogeessa io</i>           | Female | Adult | Inactive            | 3.5        | CTAD                           | Hen House         |
| MTAL1          | <i>Artibeus jamaicensis</i>   | Male   | Adult | Inactive            | 45         | CTAC                           | Peridomiciliary   |
| MTAL2          | <i>Artibeus jamaicensis</i>   | Female | Adult | Inactive            | 44         | CTAC                           | Forest            |
| MTAL3          | <i>Glossophaga soricina</i>   | Male   | Adult | Inactive            | 10.5       | CTAC                           | Forest            |
| MTAM1          | <i>Carollia perspicillata</i> | Female | Adult | Inactive            | 20         | CTAF                           | Peridomiciliary   |
| MTAM3          | <i>Carollia perspicillata</i> | Male   | Adult | Inactive            | 22         | CTAF                           | Forest            |
| MTAM5          | <i>Carollia perspicillata</i> | Male   | Adult | Inactive            | 20         | CTAF                           | Forest            |
| MTAM7          | <i>Artibeus jamaicensis</i>   | Female | Adult | Inactive            | 39         | CTAF                           | Peridomiciliary   |
| MTAM9          | <i>Carollia perspicillata</i> | Male   | Adult | Inactive            | 21         | CTAF                           | Forest            |
| MTAN1          | <i>Glossophaga soricina</i>   | Female | Adult | Inactive            | 10         | CTAE                           | Forest            |
| MTAN3          | <i>Artibeus jamaicensis</i>   | Female | Adult | Inactive            | 56         | CTAE                           | Forest            |
| MTAN5          | <i>Uroderma convexum</i>      | Male   | Adult | Inactive            | 18         | CTAE                           | Forest            |
| MTAN7          | <i>Carollia castanea</i>      | Female | Adult | Inactive            | 12.5       | CTAE                           | Peridomiciliary   |
| MTAN9          | <i>Carollia castanea</i>      | Female | Adult | Inactive            | 13         | CTAE                           | Peridomiciliary   |
| MTAO1          | <i>Rhogeessa io</i>           | Female | Adult | Inactive            | 4.5        | CTAH                           | Peridomiciliary   |
| MTAO3          | <i>Uroderma convexum</i>      | Female | Adult | Inactive            | 16         | CTAH                           | Peridomiciliary   |

| <b>Identification</b> | <b>Species</b>                | <b>Sex</b> | <b>Age</b> | <b>Reproductive status</b> | <b>Weight (g)</b> | <b>Collection site Identification</b> | <b>Mist Net Location</b> |
|-----------------------|-------------------------------|------------|------------|----------------------------|-------------------|---------------------------------------|--------------------------|
| MTAO5                 | <i>Uroderma convexum</i>      | Male       | Adult      | Inactive                   | 16.5              | CTAH                                  | Peridomiciliary          |
| MTAO7                 | <i>Uroderma convexum</i>      | Male       | Adult      | Inactive                   | 17.5              | CTAH                                  | Peridomiciliary          |
| MTAO9                 | <i>Carollia perspicillata</i> | Female     | Adult      | Inactive                   | 20.5              | CTAH                                  | Forest                   |
