# Supplementary material for: Serological Positivity against Selected Flaviviruses and Alphaviruses in Free-Ranging Bats and Birds from Costa Rica Evidence Exposure to Arboviruses Seldom Reported Locally in Humans
Source: MDPI journal article supplement (doi:10.3390/v14010093), 2022-01-06
Supplement: s1 [file s1]

Supplementary Table S3. List of birds collected in Santa Cruz.

| Identification | Species                          | Sex    | Age   | Reproductive status | Weight (g) | Collection site Identification | Mist Net Location |
|----------------|----------------------------------|--------|-------|---------------------|------------|--------------------------------|-------------------|
| ASCA1          | <i>Aimophila ruficauda</i>       | Male   | Adult | Inactive            | 37         | CSCA                           | Peridomiciliary   |
| ASCA2          | <i>Aimophila ruficauda</i>       | Male   | Adult | Inactive            | 40         | CSCA                           | Peridomiciliary   |
| ASCA3          | <i>Amazilia rutila</i>           | Na     | Adult | Inactive            | 10         | CSCA                           | Peridomiciliary   |
| ASCA4          | <i>Aimophila ruficauda</i>       | Male   | Adult | Inactive            | 36         | CSCA                           | Peridomiciliary   |
| ASCA5          | <i>Euphonia hirundinacea</i>     | Male   | Adult | Inactive            | 17         | CSCA                           | Peridomiciliary   |
| ASCA6          | <i>Columbina inca</i>            | NA     | Adult | NA                  | NA         | CSCA                           | Peridomiciliary   |
| ASCB1          | <i>Pitangus sulphuratus</i>      | Male   | Adult | Inactive            | 80         | CSCB                           | Peridomiciliary   |
| ASCC1          | <i>Polioptila plumbea</i>        | Male   | Adult | Inactive            | 7          | CSCC                           | Forest            |
| ASCC2          | <i>Columbina inca</i>            | Female | Adult | Inactive            | 54         | CSCC                           | Forest            |
| ASCD1          | <i>Turdus grayi</i>              | Male   | Adult | Inactive            | 82         | CSCD                           | Forest            |
| ASCD2          | <i>Turdus grayi</i>              | Male   | Adult | Inactive            | 80         | CSCD                           | Forest            |
| ASCE1          | <i>Amazilia rutila</i>           | Female | Adult | Inactive            | 4          | CSCE                           | Forest            |
| ASCE2          | <i>Amazilia rutila</i>           | Female | Adult | Inactive            | 4          | CSCE                           | Forest            |
| ASCH1          | <i>Campylorhynchus rufinucha</i> | Male   | Adult | Inactive            | 28         | CSCH                           | Peridomiciliary 1 |
| ASCH2          | <i>Campylorhynchus rufinucha</i> | Male   | Adult | Inactive            | 29         | CSCH                           | Peridomiciliary 1 |
| ASCH3          | <i>Campylorhynchus rufinucha</i> | Male   | Adult | Inactive            | 35         | CSCH                           | Peridomiciliary 1 |
| ASCI1          | <i>Eumomota superciliosa</i>     | Female | Adult | Inactive            | 57         | CSCA                           | River             |
| ASCI2          | <i>Columbina inca</i>            | Female | Adult | Inactive            | 36         | CSCA                           | River 2           |
| ASCI3          | <i>Columbina inca</i>            | Male   | Adult | Inactive            | 52         | CSCA                           | River 2           |
| ASCI4          | <i>Columbina inca</i>            | Female | Adult | Inactive            | 38         | CSCA                           | River 1           |
| ASCI5          | <i>Quiscalus mexicanus</i>       | Female | Adult | Inactive            | 120        | CSCA                           | River 1           |
| ASCI6          | <i>Pitangus sulphuratus</i>      | Female | Adult | Inactive            | 65         | CSCA                           | Forest            |

| Identification | Species                          | Sex    | Age   | Reproductive status | Weight (g) | Collection site Identification | Mist Net Location |
|----------------|----------------------------------|--------|-------|---------------------|------------|--------------------------------|-------------------|
| ASCI7          | <i>Pitangus sulphuratus</i>      | Female | Adult | Inactive            | 64         | CSCA                           | Forest            |
| ASCJ1          | <i>Columbina inca</i>            | Female | Adult | Inactive            | 52         | CSCB                           | Barn 1            |
| ASCJ2          | <i>Turdus grayi</i>              | Male   | Adult | Inactive            | 68         | CSCB                           | Barn              |
| ASCJ3          | <i>Columbina inca</i>            | Female | Adult | Inactive            | 37.5       | CSCB                           | Barn              |
| ASCK1          | <i>Pitangus sulphuratus</i>      | Female | Adult | Inactive            | 75         | CSCC                           | Net 1             |
| ASCK2          | <i>Quiscalus mexicanus</i>       | Female | Adult | Inactive            | 115        | CSCC                           | Net 3             |
| ASCK3          | <i>Amazilia rutila</i>           | Male   | Adult | Inactive            | 5          | CSCC                           | Net 2             |
| ASCK4          | <i>Quiscalus mexicanus</i>       | Male   | Adult | Inactive            | 115        | CSCC                           | Net 2             |
| ASCK5          | <i>Campylorhynchus rufinucha</i> | Male   | Adult | Inactive            | 29         | CSCC                           | Net 2             |
| ASCL1          | <i>Campylorhynchus rufinucha</i> | Female | Adult | Inactive            | 29         | CSCD                           | Net Hill          |
| ASCL2          | <i>Columbina inca</i>            | Male   | Adult | Inactive            | 50         | CSCD                           | Peridomiciliary   |
| ASCL3          | <i>Columbina inca</i>            | NA     | Adult | Inactive            | 60         | CSCD                           | Peridomiciliary   |
| ASCM1          | <i>Columbina inca</i>            | Female | Adult | Inactive            | 61         | CSCE                           | Peridomiciliary   |
| ASCM2          | <i>Columbina inca</i>            | Male   | Adult | Inactive            | 49         | CSCE                           | Hill              |
| ASCM3          | <i>Columbina inca</i>            | Male   | Adult | Inactive            | 53         | CSCE                           | Forest            |
| ASCM4          | <i>Columbina inca</i>            | Female | Adult | Inactive            | 52         | CSCE                           | Hill              |
| ASCM5          | <i>Icterus pustulatus</i>        | Male   | Adult | Inactive            | 45         | CSCE                           | Hill              |
| ASCM6          | <i>Icterus pustulatus</i>        | Male   | Adult | Inactive            | 40         | CSCE                           | Hill              |
| ASCM7          | <i>Vireo flavoviridis</i>        | Male   | Adult | Inactive            | 16         | CSCE                           | Hill              |
| ASCM8          | <i>Icterus pustulatus</i>        | Male   | Adult | Inactive            | 45         | CSCE                           | Hill              |
| ASCM9          | <i>Campylorhynchus rufinucha</i> | Female | Adult | Inactive            | 33.5       | CSCE                           | Hill              |
| ASCM10         | <i>Vireo flavoviridis</i>        | Female | Adult | Inactive            | 26         | CSCE                           | Hill              |
| ASCM11         | No identificado                  | Male   | Adult | Inactive            | 51         | CSCE                           | Hill              |
| ASCM12         | <i>Geothlypis philadelphia</i>   | Male   | Adult | Inactive            | 8          | CSCE                           | Forest            |

| <b>Identification</b> | <b>Species</b>                   | <b>Sex</b> | <b>Age</b> | <b>Reproductive status</b> | <b>Weight (g)</b> | <b>Collection site Identification</b> | <b>Mist Net Location</b> |
|-----------------------|----------------------------------|------------|------------|----------------------------|-------------------|---------------------------------------|--------------------------|
| ASCN1                 | <i>Amazilia rutila</i>           | Male       | Adult      | Inactive                   | 4.5               | CSCF                                  | Forest                   |
| ASCN2                 | <i>Tolmomyias sulphurescens</i>  | Female     | Adult      | Inactive                   | 14.5              | CSCF                                  | Forest                   |
| ASCN3                 | <i>Tolmomyias sulphurescens</i>  | Female     | Adult      | Inactive                   | 16                | CSCF                                  | Forest                   |
| ASCN4                 | <i>Campylorhynchus rufinucha</i> | Male       | Adult      | Inactive                   | 35                | CSCF                                  | Forest                   |
| ASCN5                 | <i>Tolmomyias sulphurescens</i>  | Male       | Adult      | Inactive                   | 19                | CSCF                                  | Forest                   |
| ASCN6                 | <i>Thryophilus pleurostictus</i> | Male       | Adult      | Inactive                   | 16.5              | CSCF                                  | Forest                   |
