# Supplementary material for: Serological Positivity against Selected Flaviviruses and Alphaviruses in Free-Ranging Bats and Birds from Costa Rica Evidence Exposure to Arboviruses Seldom Reported Locally in Humans
Source: MDPI journal article supplement (doi:10.3390/v14010093), 2022-01-06
Supplement: s1 [file s1]

Supplementary Table S4. List of birds collected in Talamanca.

| Identification | Species                        | Sex    | Age   | Reproductive status | Weight (g) | Collection site Identification | Mist Net Location |
|----------------|--------------------------------|--------|-------|---------------------|------------|--------------------------------|-------------------|
| ATAA1          | <i>Amazilia tzacatl</i>        | Female | Adult | Inactive            | 6          | CTAA                           | Peridomiciliary   |
| ATAA2          | <i>Sporophila moreletii</i>    | Male   | Adult | Inactive            | 13         | CTAA                           | Barn              |
| ATAA3          | <i>Sporophila moreletii</i>    | Male   | Adult | Inactive            | 11         | CTAA                           | Forest            |
| ATAA4          | <i>Pitangus sulphuratus</i>    | Male   | Adult | Inactive            | 64         | CTAA                           | Forest            |
| ATAA5          | <i>Pitangus sulphuratus</i>    | Male   | Adult | Inactive            | 60         | CTAA                           | Forest            |
| ATAA6          | <i>Sporophila moreletii</i>    | Male   | Adult | Inactive            | 11         | CTAA                           | Barn              |
| ATAA7          | <i>Amazilia tzacatl</i>        | Female | Adult | Inactive            | 5          | CTAA                           | Barn              |
| ATAA8          | <i>Crotophaga sulcirostris</i> | Male   | Adult | Inactive            | 77         | CTAA                           | Forest            |
| ATAA9          | <i>Ramphocelus passerinii</i>  | Male   | Adult | Inactive            | 20         | CTAA                           | Forest            |
| ATAA10         | <i>Sporophila moreletii</i>    | Female | Adult | Inactive            | 10         | CTAA                           | Forest            |
| ATAA11         | <i>Sporophila moreletii</i>    | Male   | Adult | Inactive            | 10         | CTAA                           | Forest            |
| ATAA12         | <i>Tyrannus melancholicus</i>  | Male   | Adult | Inactive            | 25         | CTAA                           | Forest            |
| ATAA13         | <i>Sporophila moreletii</i>    | Male   | Adult | Inactive            | 11.5       | CTAA                           | Forest            |
| ATAA14         | <i>Sporophila moreletii</i>    | Male   | Adult | Inactive            | 10         | CTAA                           | Forest            |
| ATAA15         | <i>Sporophila moreletii</i>    | Male   | Adult | Inactive            | 10         | CTAA                           | Forest            |
| ATAA16         | <i>Sporophila moreletii</i>    | Female | Adult | Inactive            | 10.5       | CTAA                           | Forest            |
| ATAA17         | <i>Sporophila moreletii</i>    | Male   | Adult | Inactive            | 10         | CTAA                           | Forest            |
| ATAA18         | <i>Sporophila moreletii</i>    | Male   | Adult | Inactive            | 10         | CTAA                           | Forest            |
| ATAA19         | <i>Turdus grayi</i>            | Female | Adult | Inactive            | 70         | CTAA                           | Forest            |
| ATAA20         | <i>Nyctidromus albicollis</i>  | Female | Adult | Inactive            | 56         | CTAA                           | Forest            |
| ATAA21         | <i>Tyrannus melancholicus</i>  | Male   | Adult | Inactive            | 38         | CTAA                           | Forest            |
| ATAA22         | <i>Ramphocelus passerinii</i>  | Male   | Adult | Inactive            | 28         | CTAA                           | Forest            |

| Identification | Species                            | Sex    | Age   | Reproductive status | Weight (g) | Collection site Identification | Mist Net Location |
|----------------|------------------------------------|--------|-------|---------------------|------------|--------------------------------|-------------------|
| ATAB1          | <i>Amazilia tzacatl</i>            | Male   | Adult | Inactive            | 5          | CTAB                           | Forest            |
| ATAB2          | <i>Glaucis aeneus</i>              | Female | Adult | Inactive            | 6          | CTAB                           | Forest            |
| ATAB3          | <i>Turdus grayi</i>                | Male   | Adult | Inactive            | 70         | CTAB                           | Forest            |
| ATAC1          | <i>Amazilia tzacatl</i>            | Female | Adult | Inactive            | 7          | CTAC                           | Forest 1          |
| ATAC2          | <i>Habia fuscicauda</i>            | Male   | Adult | Inactive            | 47         | CTAC                           | Forest 2          |
| ATAC3          | <i>Phaethornis striigularis</i>    | Male   | Adult | Inactive            | 2.5        | CTAC                           | Peridomiciliary   |
| ATAC4          | <i>Habia fuscicauda</i>            | Female | Adult | Inactive            | 28         | CTAC                           | Peridomiciliary   |
| ATAC5          | <i>Habia fuscicauda</i>            | Female | Adult | Inactive            | 39.5       | CTAC                           | Forest 2          |
| ATAC6          | <i>Chloroceryle amazona</i>        | Male   | Adult | Inactive            | 32         | CTAC                           | Forest 2          |
| ATAC7          | <i>Amazilia tzacatl</i>            | Female | Adult | Inactive            | 4.5        | CTAC                           | Forest 2          |
| ATAC8          | <i>Xiphorhynchus erythropygius</i> | Female | Adult | Inactive            | 43         | CTAC                           | Forest 2          |
| ATAD1          | <i>Glaucis aeneus</i>              | Male   | Adult | Inactive            | 7          | CTAD                           | Peridomiciliary   |
| ATAD2          | <i>Glaucis aeneus</i>              | Male   | Adult | Inactive            | 7          | CTAD                           | Peridomiciliary   |
| ATAD3          | <i>Amazilia tzacatl</i>            | Male   | Adult | Inactive            | 5          | CTAD                           | Peridomiciliary   |
| ATAE1          | <i>Phaethornis longirostris</i>    | Male   | Adult | Inactive            | 6          | CTAE                           | Forest            |
| ATAE2          | <i>Troglodytes aedon</i>           | Male   | Adult | Inactive            | 10         | CTAE                           | Paddock           |
| ATAE3          | <i>Glaucis aeneus</i>              | Male   | Adult | Inactive            | 5          | CTAE                           | Forest            |
| ATAE4          | <i>Sporophila morelleti</i>        | Female | Adult | Inactive            | 10         | CTAE                           | Paddock           |
| ATAE5          | <i>Sporophila funérea</i>          | Female | Adult | Inactive            | 12         | CTAE                           | Paddock           |
| ATAE6          | <i>Sporophila morelleti</i>        | Female | Adult | Inactive            | 10         | CTAE                           | Paddock           |
| ATAE7          | <i>Todirostrum cinereum</i>        | Male   | Adult | Inactive            | 5.5        | CTAE                           | Paddock           |
| ATAE8          | <i>Sporophila morelleti</i>        | Male   | Adult | Inactive            | 9.5        | CTAE                           | Paddock           |
| ATAE9          | <i>Sporophila morelleti</i>        | Male   | Adult | Inactive            | 10.5       | CTAE                           | Paddock           |
| ATAE10         | <i>Dendrocincla fuliginosa</i>     | Male   | Adult | Inactive            | 37         | CTAE                           | Forest            |

| Identification | Species                         | Sex    | Age   | Reproductive status | Weight (g) | Collection site Identification | Mist Net Location |
|----------------|---------------------------------|--------|-------|---------------------|------------|--------------------------------|-------------------|
| ATAE11         | <i>Sporophila morelleti</i>     | Female | Adult | Inactive            | 10         | CTAE                           | Forest            |
| ATAE12         | <i>Sporophila morelleti</i>     | Female | Adult | Inactive            | 9.5        | CTAE                           | Forest            |
| ATAE13         | <i>Mionectes oleagineus</i>     | Male   | Adult | Inactive            | 10.5       | CTAE                           | Forest            |
| ATAF1          | <i>Myiozetetes similis</i>      | Female | Adult | Inactive            | 20.5       | CTAF                           | Peridomiciliary   |
| ATAF2          | <i>Euphonia luteicapilla</i>    | Male   | Adult | Inactive            | 10.5       | CTAF                           | Forest            |
| ATAF3          | <i>Phaethornis longirostris</i> | Male   | Adult | Inactive            | 6          | CTAF                           | Peridomiciliary   |
| ATAF4          | <i>Crotophaga sulcirostris</i>  | Male   | Adult | Inactive            | 83         | CTAF                           | Forest            |
| ATAF5          | <i>Troglodytes aedon</i>        | Female | Adult | Inactive            | 11         | CTAF                           | Peridomiciliary   |
| ATAH1          | <i>Myiozetetes similis</i>      | Male   | Adult | Inactive            | 26         | CTAH                           | Forest            |
| ATAH2          | <i>Myiozetetes similis</i>      | Male   | Adult | Inactive            | 27         | CTAH                           | Forest            |
| ATAH3          | <i>Myiozetetes similis</i>      | Male   | Adult | Inactive            | 29         | CTAH                           | Forest            |
| ATAH4          | <i>Myiozetetes similis</i>      | Male   | Adult | Inactive            | 29         | CTAH                           | Forest            |
| ATAH5          | <i>Myiozetetes similis</i>      | Male   | Adult | Inactive            | 25         | CTAH                           | Forest            |
| ATAH6          | <i>Troglodytes aedon</i>        | Male   | Adult | Inactive            | 13         | CTAH                           | Forest            |
| ATAI1          | <i>Patagioenas flavirostris</i> | Male   | Adult | Inactive            | 260        | CTAA                           | Forest            |
| ATAI2          | <i>Sporophila morelleti</i>     | Male   | Adult | Inactive            | 11.5       | CTAA                           | Forest            |
| ATAI3          | <i>Sporophila morelleti</i>     | Male   | Adult | Inactive            | 9.5        | CTAA                           | Forest            |
| ATAI4          | <i>Sporophila morelleti</i>     | Female | Adult | Inactive            | 10.5       | CTAA                           | Forest            |
| ATAI5          | <i>Sporophila morelleti</i>     | Male   | Adult | Inactive            | 11         | CTAA                           | Forest            |
| ATAI6          | <i>Pitangus sulphuratus</i>     | Female | Adult | Inactive            | 60         | CTAA                           | Peridomiciliary   |
| ATAI7          | <i>Pitangus sulphuratus</i>     | Female | Adult | Inactive            | 63         | CTAA                           | Peridomiciliary   |
| ATAI8          | <i>Sporophila morelleti</i>     | NA     | Adult | Inactive            | 10         | CTAA                           | Forest            |
| ATAJ1          | <i>Empidonax virescens</i>      | Male   | Adult | Inactive            | 14.5       | CTAB                           | Peridomiciliary   |
| ATAJ2          | <i>Catharus ustulatus</i>       | Male   | Adult | Inactive            | 27         | CTAB                           | Forest            |

| Identification | Species                         | Sex    | Age   | Reproductive status | Weight (g) | Collection site Identification | Mist Net Location |
|----------------|---------------------------------|--------|-------|---------------------|------------|--------------------------------|-------------------|
| ATAJ3          | <i>Empidonax virescens</i>      | Male   | Adult | Inactive            | 12         | CTAB                           | Forest            |
| ATAJ4          | <i>Xiphorhynchus susurrans</i>  | Female | Adult | Inactive            | 46.5       | CTAB                           | Forest            |
| ATAK1          | <i>Phaethornis striigularis</i> | Female | Adult | Inactive            | 2.5        | CTAD                           | Forest            |
| ATAL1          | <i>Turdus grayi</i>             | Female | Adult | Inactive            | 79         | CTAC                           | Peridomiciliary   |
| ATAL2          | <i>Parkesia noveboracensis</i>  | Male   | Adult | Inactive            | 14         | CTAC                           | Peridomiciliary   |
| ATAL3          | <i>Empidonax alnorum</i>        | Male   | Adult | Inactive            | 12.5       | CTAC                           | Peridomiciliary   |
| ATAL4          | <i>Piranga rubra</i>            | Male   | Adult | Inactive            | 32         | CTAC                           | Forest            |
| ATAL5          | <i>Empidonax virescens</i>      | Male   | Adult | Inactive            | 10         | CTAC                           | Forest            |
| ATAM1          | <i>Empidonax virescens</i>      | Male   | Adult | Inactive            | 13.5       | CTAF                           | Peridomiciliary   |
| ATAN1          | <i>Amazilia tzacatl</i>         | Male   | Adult | Inactive            | 5          | CTAE                           | Forest            |
| ATAN2          | <i>Crotophaga sulcirostris</i>  | Female | Adult | Inactive            | 73         | CTAE                           | Peridomiciliary   |
| ATAN3          | <i>Crotophaga sulcirostris</i>  | Male   | Adult | Inactive            | 81         | CTAE                           | Peridomiciliary   |
| ATAN4          | <i>Dendrocincla fuliginosa</i>  | Male   | Adult | Inactive            | 46         | CTAE                           | Peridomiciliary   |
| ATA01          | <i>Vireo flavifrons</i>         | Male   | Adult | Inactive            | 16         | CTAH                           | Forest            |
| ATA02          | <i>Amazilia tzacatl</i>         | Male   | Adult | Inactive            | 6          | CTAH                           | Peridomiciliary   |
| ATA03          | <i>Sporophila moreletii</i>     | Male   | Adult | Inactive            | 11         | CTAH                           | Forest            |
| ATA04          | <i>Myiozetetes similis</i>      | Male   | Adult | Inactive            | 27         | CTAH                           | Forest            |
| ATA05          | <i>Parkesia noveboracensis</i>  | Male   | Adult | Inactive            | 14.5       | CTAH                           | Forest            |
