# Supplementary material for: Serological Positivity against Selected Flaviviruses and Alphaviruses in Free-Ranging Bats and Birds from Costa Rica Evidence Exposure to Arboviruses Seldom Reported Locally in Humans
Source: MDPI journal article supplement (doi:10.3390/v14010093), 2022-01-06
Supplement: s1 [file s1]

Supplementary Table S1. List of bats collected in Santa Cruz.

| Identification | Species                       | Sex    | Age      | Reproductive status | Weight (g) | Collection site Identification | Mist Net Location |
|----------------|-------------------------------|--------|----------|---------------------|------------|--------------------------------|-------------------|
| MSCA2          | <i>Saccopteryx leptura</i>    | Female | Adult    | Inactive            | 5          | CSCA                           | Barn              |
| MSCA4          | <i>Saccopteryx bilineata</i>  | Male   | Adult    | Inactive            | 6          | CSCA                           | Barn              |
| MSCA6          | <i>Glossophaga soricina</i>   | Female | Adult    | Inactive            | 9          | CSCA                           | Forest            |
| MSCA7          | <i>Saccopteryx leptura</i>    | Na     | Adult    | Inactive            | 4          | CSCA                           | Barn              |
| MSCA14         | <i>Glossophaga soricina</i>   | Female | Adult    | Inactive            | 11         | CSCA                           | Forest            |
| MSCB1          | <i>Artibeus jamaicensis</i>   | Male   | Adult    | Inactive            | 41.5       | CSCB                           | Forest            |
| MSCB2          | <i>Carollia perspicillata</i> | NA     | Adult    | Inactive            | 19         | CSCB                           | Forest            |
| MSCB3          | <i>Noctilio leporinus</i>     | Male   | Adult    | Inactive            | 55         | CSCB                           | House             |
| MSCB4          | <i>Noctilio leporinus</i>     | Na     | Adult    | Inactive            | 50         | CSCB                           | House             |
| MSCB5          | <i>Artibeus jamaicensis</i>   | Male   | Adult    | Inactive            | 21.5       | CSCB                           | House             |
| MSCC1          | <i>Uroderma convexum</i>      | Male   | Juvenile | Inactive            | 9          | CSCC                           | Forest            |
| MSCC2          | <i>Micronycteris hirsuta</i>  | Female | Adult    | Nursling            | 19         | CSCC                           | Forest            |
| MSCC3          | <i>Glossophaga soricina</i>   | Female | Adult    | Inactive            | 8.5        | CSCC                           | Peridomiciliary   |
| MSCC4          | <i>Phyllostomus discolor</i>  | Male   | Adult    | Inactive            | 39         | CSCC                           | Forest            |
| MSCC5          | <i>Phyllostomus discolor</i>  | Female | Adult    | Pregnant            | 39         | CSCC                           | Forest            |
| MSCD1          | <i>Artibeus jamaicensis</i>   | Male   | Adult    | Inactive            | 39         | CSCD                           | Peridomiciliary   |
| MSCD2          | <i>Rhogeessa tumida</i>       | Female | Adult    | Inactive            | 4.5        | CSCD                           | Peridomiciliary   |
| MSCD3          | <i>Artibeus jamaicensis</i>   | Male   | Adult    | Inactive            | NA         | CSCD                           | Forest            |
| MSCD4          | <i>Glossophaga soricina</i>   | Female | Adult    | Inactive            | 9          | CSCD                           | Forest            |
| MSCE1          | <i>Artibeus phaeotis</i>      | Male   | Adult    | Inactive            | 11         | CSCE                           | Forest            |
| MSCF1          | <i>Chiroderma trinitatum</i>  | Female | Adult    | Inactive            | 11         | CSCF                           | Barn              |
| MSCF2          | <i>Myotis nigricans</i>       | Female | Adult    | Inactive            | 4          | CSCF                           | Barn              |

| Identification | Species                     | Sex    | Age   | Reproductive status | Weight (g) | Collection site Identification | Mist Net Location |
|----------------|-----------------------------|--------|-------|---------------------|------------|--------------------------------|-------------------|
| MSCF3          | <i>Desmodus rotundus</i>    | Female | Adult | Inactive            | 45         | CSCF                           | No Unspecified    |
| MSCF4          | <i>Artibeus phaeotis</i>    | Male   | Adult | Inactive            | 11         | CSCF                           | House             |
| MSCF5          | <i>Desmodus rotundus</i>    | Female | Adult | Inactive            | 53         | CSCF                           | House             |
| MSCG3          | <i>Saccopteryx leptura</i>  | Female | Adult | Inactive            | 7          | CSCG                           | Domiciliary       |
| MSCG4          | <i>Artibeus jamaicensis</i> | Female | Adult | Inactive            | 46         | CSCG                           | Forest            |
| MSCG5          | <i>Artibeus jamaicensis</i> | Male   | Adult | Inactive            | 34         | CSCG                           | Forest            |
| MSCG7          | <i>Artibeus jamaicensis</i> | Male   | Adult | Inactive            | 49         | CSCG                           | Domiciliary       |
| MSCG9          | <i>Sturnira parvidens</i>   | Female | Adult | Inactive            | 13         | CSCG                           | Forest            |
| MSCG11         | <i>Glossophaga soricina</i> | Male   | Adult | Inactive            | 17         | CSCG                           | Domiciliary       |
| MSCG12         | <i>Artibeus jamaicensis</i> | Female | Adult | Inactive            | 33         | CSCG                           | Forest            |
| MSCG14         | <i>Artibeus jamaicensis</i> | Female | Adult | Inactive            | 28         | CSCG                           | Forest            |
| MSCG17         | <i>Glossophaga soricina</i> | Female | Adult | Inactive            | 14         | CSCG                           | Forest            |
| MSCH1          | <i>Artibeus jamaicensis</i> | Male   | Adult | Inactive            | 41         | CSCH                           | Forest            |
| MSCH2          | <i>Sturnira parvidens</i>   | Female | Adult | Pregnant            | 16         | CSCH                           | Domiciliary       |
| MSCH4          | <i>Sturnira parvidens</i>   | Female | Adult | Pregnant            | 16         | CSCH                           | Forest            |
| MSCH6          | <i>Artibeus jamaicensis</i> | Male   | Adult | Inactive            | 37         | CSCH                           | Forest            |
| MSCH8          | <i>Artibeus jamaicensis</i> | Male   | Adult | Inactive            | 36         | CSCH                           | Forest            |
| MSCH10         | <i>Sturnira parvidens</i>   | Female | Adult | Pregnant            | 20         | CSCH                           | Forest            |
| MSCH11         | <i>Sturnira parvidens</i>   | Female | Adult | Pregnant            | 21         | CSCH                           | Forest            |
| MSCI1          | <i>Artibeus jamaicensis</i> | Male   | Adult | Inactive            | 49         | CSCA                           | River             |
| MSCI2          | <i>Artibeus phaeotis</i>    | Female | Adult | Inactive            | 12         | CSCA                           | River             |
| MSCI3          | <i>Chiroderma salvini</i>   | Male   | Adult | Inactive            | 16         | CSCA                           | River             |
| MSCI4          | <i>Artibeus phaeotis</i>    | Female | Adult | Pregnant            | 12         | CSCA                           | Forest            |
| MSCI5          | <i>Sturnira parvidens</i>   | Female | Adult | Pregnant            | 21         | CSCA                           | Forest            |

| Identification | Species                           | Sex    | Age   | Reproductive status | Weight (g) | Collection site Identification | Mist Net Location |
|----------------|-----------------------------------|--------|-------|---------------------|------------|--------------------------------|-------------------|
| MSCJ1          | <i>Pteronotus mesoamericanus</i>  | Female | Adult | Pregnant            | 18.5       | CSCB                           | Barn              |
| MSCJ5          | <i>Pteronotus mesoamericanus</i>  | Female | Adult | Pregnant            | 19         | CSCB                           | Barn              |
| MSCJ7          | <i>Sturnira parvidens</i>         | Female | Adult | Inactive            | 14         | CSCB                           | Barn              |
| MSCJ9          | <i>Artibeus jamaicensis</i>       | Male   | Adult | Inactive            | 38.5       | CSCB                           | Forest            |
| MSCJ13         | <i>Carollia perspicillata</i>     | Male   | Adult | Inactive            | 19         | CSCB                           | Forest            |
| MSCK1          | <i>Carollia perspicillata</i>     | Female | Adult | Inactive            | 19         | CSCC                           | Forest            |
| MSCK2          | <i>Rhynchonycteris naso</i>       | Female | Adult | Inactive            | 4          | CSCC                           | Peridomiciliary   |
| MSCL1          | <i>Hylonycteris underwoodi</i>    | Female | Adult | Inactive            | 10         | CSCD                           | Forest            |
| MSCL3          | <i>Carollia perspicillata</i>     | Male   | Adult | Inactive            | 18.5       | CSCD                           | Forest            |
| MSCL5          | <i>Rhogeessa tumida</i>           | Female | Adult | Pregnant (twins)    | 4          | CSCD                           | Peridomiciliary   |
| MSCL7          | <i>Carollia perspicillata</i>     | Female | Adult | Inactive            | 15         | CSCD                           | Forest            |
| MSCL9          | <i>Desmodus rotundus</i>          | Female | Adult | Inactive            | 32         | CSCD                           | Forest            |
| MSCM3          | <i>Phyllostomus discolor</i>      | Na     | Adult | Inactive            | 41         | CSCE                           | Forest            |
| MSCM4          | <i>Phyllostomus discolor</i>      | Male   | Adult | Inactive            | 43         | CSCE                           | Forest            |
| MSCM5          | <i>Phyllostomus discolor</i>      | Male   | Adult | Inactive            | 35         | CSCE                           | Forest            |
| MSCM6          | <i>Phyllostomus discolor</i>      | Male   | Adult | Inactive            | 41         | CSCE                           | Forest            |
| MSCM7          | <i>Phyllostomus discolor</i>      | Female | Adult | Inactive            | 37.5       | CSCE                           | Forest            |
| MSCN1          | <i>Artibeus lituratus</i>         | Female | Adult | Pregnant            | 66         | CSCF                           | Forest            |
| MSCN2          | <i>Pteronotus mesoamericanusi</i> | Female | Adult | Inactive            | 18         | CSCF                           | Forest            |
| MSCN3          | <i>Noctilio albiventris</i>       | Male   | Adult | Inactive            | 36         | CSCF                           | Forest            |
| MSCN4          | <i>Artibeus lituratus</i>         | Female | Adult | Pregnant            | 62         | CSCF                           | Forest            |
| MSCN6          | <i>Glossophaga soricina</i>       | Male   | Adult | Inactive            | 9          | CSCF                           | Forest            |
| MSCO1          | <i>Artibeus jamaicensis</i>       | Male   | Adult | Inactive            | 41         | CSCH                           | Forest            |
| MSCO2          | <i>Artibeus jamaicensis</i>       | Female | Adult | Pregnant            | 43         | CSCH                           | Forest            |

| <b>Identification</b> | <b>Species</b>                | <b>Sex</b> | <b>Age</b> | <b>Reproductive status</b> | <b>Weight (g)</b> | <b>Collection site Identification</b> | <b>Mist Net Location</b> |
|-----------------------|-------------------------------|------------|------------|----------------------------|-------------------|---------------------------------------|--------------------------|
| MSCO4                 | <i>Artibeus phaeotis</i>      | Male       | Adult      | Inactive                   | 10                | CSCH                                  | House                    |
| MSCO6                 | <i>Carollia perspicillata</i> | Male       | Adult      | Inactive                   | 17.5              | CSCH                                  | Forest                   |
| MSCO7                 | <i>Artibeus lituratus</i>     | Male       | Adult      | Inactive                   | 61                | CSCH                                  | Forest                   |
